# Supplementary material for: Mesoporous silica-assisted carbon free Li2MnSiO4cathode nanoparticles for high capacity Li rechargeable batteries
Source: Royal Society of Chemistry journal article supplement (doi:10.1039/c3cp53436g), 2013-11-25

Supplementary/Supporting Information

Figure S1. (a) X-ray powder diffractions of  $\text{Li}_2\text{MnSiO}_4$  sample prepared by using a spherical  $\text{SiO}_2$  template. (b) SEM image of the corresponding spherical  $\text{SiO}_2$ .

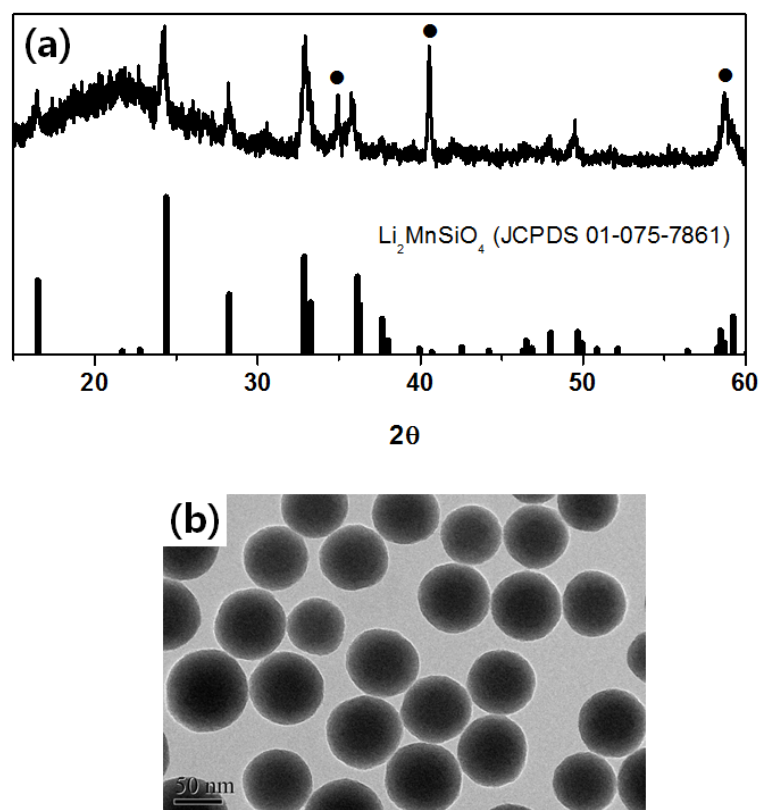

Figure S2. SEM image of pristine  $\text{Li}_2\text{MnSiO}_4$  sample prepared by conventional sol-gel process.

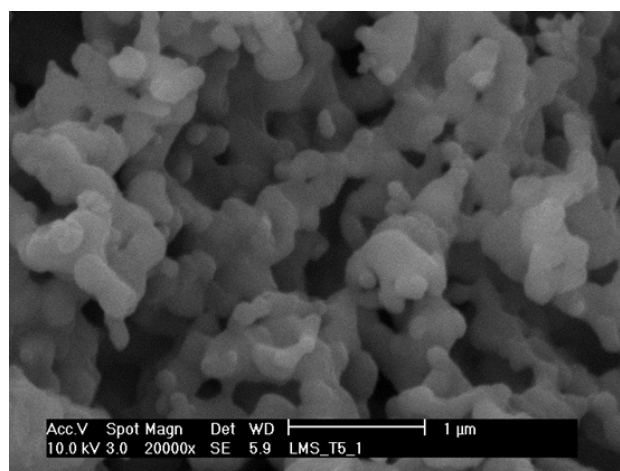

Supplement: c3cp53436g.pdf [file c3cp53436g.pdf]
